# Supplementary material
Source: publisher figshare collection journal article supplement (https://acs.figshare.com/ndownloader/files/5733834)
Supplement: Supplementary file 1 [file 5733834]

#JA027437M
data_2
 
_audit_creation_method            SHELXL-97 
_chemical_name_systematic 
; 
 3,5-diethynyl-N-(1-oxy-2,2,6,6-tetramethyl-piperidine-4-yl)-benzamide
; 
_publ_requested_journal
'Journal of the American Chemical Society'

_publ_contact_author
;Prof. Jeffrey S. Moore
Roger Adams Laboratory
Departments of Chemistry and Materials Science & Engineering
University of Illinois at Urbana-Champaign
Urbana, Illinois 61801, USA
;
_publ_contact_author_phone            ' 1(217)2444024 '
_publ_contact_author_fax              ' 1(217)2448068 '
_publ_contact_author_email            ' moore@scs.uiuc.edu'

loop_
_publ_author_name
_publ_author_address
'Dr. Kenji Matsuda'
;Roger Adams Laboratory
Departments of Chemistry and Materials Science & Engineering
University of Illinois at Urbana-Champaign
Urbana, Illinois 61801, USA
;
'Mr. Matthew T. Stone'
;Roger Adams Laboratory
Departments of Chemistry and Materials Science & Engineering
University of Illinois at Urbana-Champaign
Urbana, Illinois 61801, USA
;
'Prof. Jeffrey S. Moore'
;Roger Adams Laboratory
Departments of Chemistry and Materials Science & Engineering
University of Illinois at Urbana-Champaign
Urbana, Illinois 61801, USA
;

_chemical_name_common             ? 
_chemical_melting_point           196-199 
_chemical_formula_moiety          ? 
_chemical_formula_sum 
 'C20 H23 N2 O2' 
_chemical_formula_weight          323.42 
 
loop_ 
 _atom_type_symbol 
 _atom_type_description 
 _atom_type_scat_dispersion_real 
 _atom_type_scat_dispersion_imag 
 _atom_type_scat_source 
 'C'  'C'   0.0033   0.0016 
 'International Tables Vol C Tables 4.2.6.8 and 6.1.1.4' 
 'H'  'H'   0.0000   0.0000 
 'International Tables Vol C Tables 4.2.6.8 and 6.1.1.4' 
 'N'  'N'   0.0061   0.0033 
 'International Tables Vol C Tables 4.2.6.8 and 6.1.1.4' 
 'O'  'O'   0.0106   0.0060 
 'International Tables Vol C Tables 4.2.6.8 and 6.1.1.4' 
 
_symmetry_cell_setting            Orthorhombic 
_symmetry_space_group_name_H-M    Pbcn
 
loop_ 
 _symmetry_equiv_pos_as_xyz 
 'x, y, z' 
 '-x+1/2, -y+1/2, z+1/2' 
 '-x, y, -z+1/2' 
 'x+1/2, -y+1/2, -z' 
 '-x, -y, -z' 
 'x-1/2, y-1/2, -z-1/2' 
 'x, -y, z-1/2' 
 '-x-1/2, y-1/2, z' 
 
_cell_length_a                    30.635(4) 
_cell_length_b                    7.7786(10) 
_cell_length_c                    30.476(4) 
_cell_angle_alpha                 90.00 
_cell_angle_beta                  90.00 
_cell_angle_gamma                 90.00 
_cell_volume                      7262.4(16) 
_cell_formula_units_Z             16 
_cell_measurement_temperature     193(2) 
_cell_measurement_reflns_used     987 
_cell_measurement_theta_min       5.6 
_cell_measurement_theta_max       42.8 
 
_exptl_crystal_description        platy 
_exptl_crystal_colour             orange 
_exptl_crystal_size_max           1.15 
_exptl_crystal_size_mid           0.20 
_exptl_crystal_size_min           0.06 
_exptl_crystal_density_meas       ? 
_exptl_crystal_density_diffrn     1.183 
_exptl_crystal_density_method     'not measured' 
_exptl_crystal_F_000              2768 
_exptl_absorpt_coefficient_mu     0.077 
_exptl_absorpt_correction_type    none 
_exptl_absorpt_correction_T_min   ? 
_exptl_absorpt_correction_T_max   ? 
_exptl_absorpt_process_details    ? 
 
_exptl_special_details 
; 
 ? 
; 
 
_diffrn_ambient_temperature       193(2) 
_diffrn_radiation_wavelength      0.71073 
_diffrn_radiation_type            MoK\a 
_diffrn_radiation_source          'fine-focus sealed tube' 
_diffrn_radiation_monochromator   graphite 
_diffrn_measurement_device_type   'CCD area detector' 
_diffrn_measurement_method        'phi and omega scans' 
_diffrn_detector_area_resol_mean  ? 
_diffrn_standards_number          335 
_diffrn_standards_interval_count  ? 
_diffrn_standards_interval_time   397 
_diffrn_standards_decay_%         1.3 
_diffrn_reflns_number             37753 
_diffrn_reflns_av_R_equivalents   0.2044 
_diffrn_reflns_av_sigmaI/netI     0.1504 
_diffrn_reflns_limit_h_min        -24 
_diffrn_reflns_limit_h_max        36 
_diffrn_reflns_limit_k_min        -9 
_diffrn_reflns_limit_k_max        9 
_diffrn_reflns_limit_l_min        -36 
_diffrn_reflns_limit_l_max        36 
_diffrn_reflns_theta_min          1.49 
_diffrn_reflns_theta_max          25.41 
_reflns_number_total              6677 
_reflns_number_gt                 3392 
_reflns_threshold_expression      >2sigma(I) 
 
_computing_data_collection        'Bruker SMART' 
_computing_cell_refinement        'Bruker SMART' 
_computing_data_reduction         'Bruker SHELXTL'
_computing_structure_solution     'SHELXS-97 (Sheldrick, 1990)' 
_computing_structure_refinement   'SHELXL-97 (Sheldrick, 1997)' 
_computing_molecular_graphics     'Bruker SHELXTL' 
_computing_publication_material   'Bruker SHELXTL' 
 
_refine_special_details 
; 
 Refinement of F^2^ against ALL reflections.  The weighted R-factor wR and 
 goodness of fit S are based on F^2^, conventional R-factors R are based 
 on F, with F set to zero for negative F^2^. The threshold expression of 
 F^2^ > 2sigma(F^2^) is used only for calculating R-factors(gt) etc. and is 
 not relevant to the choice of reflections for refinement.  R-factors based 
 on F^2^ are statistically about twice as large as those based on F, and R- 
 factors based on ALL data will be even larger. 
; 
 
_refine_ls_structure_factor_coef  Fsqd  
_refine_ls_matrix_type            full 
_refine_ls_weighting_scheme       calc  
_refine_ls_weighting_details 
 'calc w=1/[\s^2^(Fo^2^)+(0.0900P)^2^+0.0000P] where P=(Fo^2^+2Fc^2^)/3' 
_atom_sites_solution_primary      direct 
_atom_sites_solution_secondary    difmap 
_atom_sites_solution_hydrogens    geom 
_refine_ls_hydrogen_treatment     mixed 
_refine_ls_extinction_method      none 
_refine_ls_extinction_coef        ? 
_refine_ls_number_reflns          6677 
_refine_ls_number_parameters      439 
_refine_ls_number_restraints      0 
_refine_ls_R_factor_all           0.1559 
_refine_ls_R_factor_gt            0.0736 
_refine_ls_wR_factor_ref          0.1917 
_refine_ls_wR_factor_gt           0.1632 
_refine_ls_goodness_of_fit_ref    0.952 
_refine_ls_restrained_S_all       0.952 
_refine_ls_shift/su_max           0.001 
_refine_ls_shift/su_mean          0.000 
 
loop_ 
 _atom_site_label 
 _atom_site_type_symbol 
 _atom_site_fract_x 
 _atom_site_fract_y 
 _atom_site_fract_z 
 _atom_site_U_iso_or_equiv 
 _atom_site_adp_type 
 _atom_site_occupancy 
 _atom_site_symmetry_multiplicity 
 _atom_site_calc_flag 
 _atom_site_refinement_flags 
 _atom_site_disorder_assembly 
 _atom_site_disorder_group 
C1 C 0.67177(13) 0.4508(5) 0.54236(11) 0.0355(10) Uani 1 1 d . . . 
H1A H 0.6903 0.3474 0.5459 0.043 Uiso 1 1 calc R . . 
H1B H 0.6465 0.4183 0.5239 0.043 Uiso 1 1 calc R . . 
C2 C 0.65495(12) 0.5056(4) 0.58753(11) 0.0278(9) Uani 1 1 d . . . 
C3 C 0.65248(11) 0.8216(4) 0.55549(11) 0.0282(9) Uani 1 1 d . . . 
C4 C 0.66891(12) 0.7433(4) 0.51226(11) 0.0311(9) Uani 1 1 d . . . 
H4A H 0.6434 0.7098 0.4942 0.037 Uiso 1 1 calc R . . 
H4B H 0.6854 0.8321 0.4959 0.037 Uiso 1 1 calc R . . 
C5 C 0.69792(13) 0.5878(5) 0.51861(11) 0.0337(9) Uani 1 1 d . . . 
H5A H 0.7239 0.6202 0.5366 0.040 Uiso 1 1 calc R . . 
C6 C 0.75102(13) 0.5640(5) 0.45809(11) 0.0290(9) Uani 1 1 d . . . 
C7 C 0.75843(12) 0.4976(4) 0.41238(11) 0.0274(9) Uani 1 1 d . . . 
C8 C 0.80172(12) 0.4881(4) 0.39782(10) 0.0270(9) Uani 1 1 d . . . 
H8A H 0.8248 0.5180 0.4171 0.032 Uiso 1 1 calc R . . 
C9 C 0.81109(12) 0.4350(4) 0.35516(10) 0.0258(8) Uani 1 1 d . . . 
C10 C 0.77732(11) 0.3882(4) 0.32730(11) 0.0297(9) Uani 1 1 d . . . 
H10A H 0.7838 0.3481 0.2986 0.036 Uiso 1 1 calc R . . 
C11 C 0.73388(12) 0.3993(4) 0.34110(11) 0.0268(9) Uani 1 1 d . . . 
C12 C 0.72533(11) 0.4524(4) 0.38392(11) 0.0270(8) Uani 1 1 d . . . 
H12A H 0.6959 0.4576 0.3938 0.032 Uiso 1 1 calc R . . 
C13 C 0.69137(14) 0.5073(5) 0.62218(12) 0.0469(11) Uani 1 1 d . . . 
H13A H 0.6794 0.5448 0.6504 0.070 Uiso 1 1 calc R . . 
H13B H 0.7144 0.5869 0.6130 0.070 Uiso 1 1 calc R . . 
H13C H 0.7035 0.3914 0.6252 0.070 Uiso 1 1 calc R . . 
C14 C 0.61876(13) 0.3839(5) 0.60248(12) 0.0407(11) Uani 1 1 d . . . 
H14A H 0.5955 0.3819 0.5804 0.061 Uiso 1 1 calc R . . 
H14B H 0.6069 0.4239 0.6305 0.061 Uiso 1 1 calc R . . 
H14C H 0.6307 0.2679 0.6061 0.061 Uiso 1 1 calc R . . 
C15 C 0.68861(13) 0.9206(5) 0.57923(12) 0.0391(10) Uani 1 1 d . . . 
H15A H 0.7130 0.8428 0.5856 0.059 Uiso 1 1 calc R . . 
H15B H 0.6771 0.9676 0.6068 0.059 Uiso 1 1 calc R . . 
H15C H 0.6989 1.0149 0.5605 0.059 Uiso 1 1 calc R . . 
C16 C 0.61463(13) 0.9428(5) 0.54569(14) 0.0475(11) Uani 1 1 d . . . 
H16A H 0.6039 0.9930 0.5732 0.071 Uiso 1 1 calc R . . 
H16B H 0.5910 0.8786 0.5315 0.071 Uiso 1 1 calc R . . 
H16C H 0.6246 1.0347 0.5261 0.071 Uiso 1 1 calc R . . 
C17 C 0.85557(13) 0.4325(5) 0.33876(11) 0.0323(9) Uani 1 1 d . . . 
C18 C 0.89050(13) 0.4337(5) 0.32399(12) 0.0398(10) Uani 1 1 d . . . 
H18 H 0.9191 0.4346 0.3119 0.048 Uiso 1 1 calc R . . 
C19 C 0.69915(13) 0.3529(5) 0.31135(12) 0.0323(9) Uani 1 1 d . . . 
C20 C 0.67145(14) 0.3136(5) 0.28668(13) 0.0443(11) Uani 1 1 d . . . 
H20 H 0.6490 0.2819 0.2667 0.053 Uiso 1 1 calc R . . 
N1 N 0.71216(12) 0.5237(4) 0.47610(11) 0.0461(10) Uani 1 1 d . . . 
H1 H 0.7018(14) 0.436(5) 0.4682(13) 0.055 Uiso 1 1 d . . . 
N2 N 0.63577(9) 0.6816(3) 0.58438(9) 0.0248(7) Uani 1 1 d . . . 
O1 O 0.77775(9) 0.6536(3) 0.47654(8) 0.0425(7) Uani 1 1 d . . . 
O2 O 0.61311(8) 0.7291(3) 0.61770(8) 0.0373(7) Uani 1 1 d . . . 
C21 C 1.00477(12) 0.9220(4) 0.13250(11) 0.0309(9) Uani 1 1 d . . . 
H21A H 1.0054 0.9480 0.1643 0.037 Uiso 1 1 calc R . . 
H21B H 0.9767 0.9647 0.1207 0.037 Uiso 1 1 calc R . . 
C22 C 1.04229(12) 1.0196(4) 0.10993(10) 0.0297(9) Uani 1 1 d . . . 
C23 C 1.04274(12) 0.7674(4) 0.05154(11) 0.0316(9) Uani 1 1 d . . . 
C24 C 1.00499(12) 0.6910(4) 0.07762(11) 0.0318(9) Uani 1 1 d . . . 
H24A H 0.9772 0.7358 0.0656 0.038 Uiso 1 1 calc R . . 
H24B H 1.0050 0.5648 0.0736 0.038 Uiso 1 1 calc R . . 
C25 C 1.00667(11) 0.7304(4) 0.12644(10) 0.0257(9) Uani 1 1 d . . . 
H25A H 1.0350 0.6874 0.1385 0.031 Uiso 1 1 calc R . . 
C26 C 0.97789(12) 0.5282(4) 0.18123(10) 0.0220(8) Uani 1 1 d . . . 
C27 C 0.93990(11) 0.4190(4) 0.19574(10) 0.0215(8) Uani 1 1 d . . . 
C28 C 0.95037(11) 0.2582(4) 0.21224(10) 0.0231(8) Uani 1 1 d . . . 
H28A H 0.9802 0.2252 0.2142 0.028 Uiso 1 1 calc R . . 
C29 C 0.91803(11) 0.1435(4) 0.22606(10) 0.0245(8) Uani 1 1 d . . . 
C30 C 0.87459(11) 0.1981(4) 0.22449(10) 0.0268(9) Uani 1 1 d . . . 
H30A H 0.8522 0.1235 0.2347 0.032 Uiso 1 1 calc R . . 
C31 C 0.86347(11) 0.3588(4) 0.20838(11) 0.0257(8) Uani 1 1 d . . . 
C32 C 0.89663(11) 0.4710(4) 0.19358(10) 0.0253(8) Uani 1 1 d . . . 
H32A H 0.8894 0.5811 0.1822 0.030 Uiso 1 1 calc R . . 
C33 C 1.08541(13) 0.9993(5) 0.13490(12) 0.0456(11) Uani 1 1 d . . . 
H33A H 1.1086 1.0614 0.1194 0.068 Uiso 1 1 calc R . . 
H33B H 1.0930 0.8772 0.1367 0.068 Uiso 1 1 calc R . . 
H33C H 1.0822 1.0464 0.1645 0.068 Uiso 1 1 calc R . . 
C34 C 1.03042(14) 1.2096(4) 0.10650(12) 0.0423(11) Uani 1 1 d . . . 
H34A H 1.0542 1.2719 0.0919 0.063 Uiso 1 1 calc R . . 
H34B H 1.0260 1.2567 0.1360 0.063 Uiso 1 1 calc R . . 
H34C H 1.0035 1.2221 0.0894 0.063 Uiso 1 1 calc R . . 
C35 C 1.08561(13) 0.6716(5) 0.06001(12) 0.0449(11) Uani 1 1 d . . . 
H35A H 1.1090 0.7244 0.0427 0.067 Uiso 1 1 calc R . . 
H35B H 1.0823 0.5509 0.0514 0.067 Uiso 1 1 calc R . . 
H35C H 1.0929 0.6782 0.0913 0.067 Uiso 1 1 calc R . . 
C36 C 1.03169(14) 0.7621(5) 0.00275(11) 0.0447(11) Uani 1 1 d . . . 
H36A H 1.0042 0.8235 -0.0024 0.067 Uiso 1 1 calc R . . 
H36B H 1.0286 0.6422 -0.0067 0.067 Uiso 1 1 calc R . . 
H36C H 1.0552 0.8170 -0.0140 0.067 Uiso 1 1 calc R . . 
C37 C 0.93017(12) -0.0235(5) 0.24162(11) 0.0269(9) Uani 1 1 d . . . 
C38 C 0.94249(12) -0.1588(5) 0.25405(12) 0.0359(10) Uani 1 1 d . . . 
H38 H 0.9524 -0.2677 0.2641 0.043 Uiso 1 1 calc R . . 
C39 C 0.81858(13) 0.4135(5) 0.20663(11) 0.0342(9) Uani 1 1 d . . . 
C40 C 0.78207(15) 0.4577(6) 0.20566(14) 0.0623(14) Uani 1 1 d . . . 
H40 H 0.7524 0.4937 0.2049 0.075 Uiso 1 1 calc R . . 
N3 N 0.97094(10) 0.6411(4) 0.14871(9) 0.0272(7) Uani 1 1 d . . . 
H3 H 0.9454(11) 0.659(4) 0.1364(11) 0.033 Uiso 1 1 d . . . 
N4 N 1.04814(9) 0.9520(4) 0.06395(9) 0.0302(7) Uani 1 1 d . . . 
O3 O 1.01418(8) 0.5058(3) 0.19749(7) 0.0307(6) Uani 1 1 d . . . 
O4 O 1.07332(9) 1.0414(3) 0.03876(8) 0.0481(8) Uani 1 1 d . . . 
 
loop_ 
 _atom_site_aniso_label 
 _atom_site_aniso_U_11 
 _atom_site_aniso_U_22 
 _atom_site_aniso_U_33 
 _atom_site_aniso_U_23 
 _atom_site_aniso_U_13 
 _atom_site_aniso_U_12 
C1 0.039(2) 0.033(2) 0.034(2) -0.0054(17) 0.0157(19) 0.0011(19) 
C2 0.033(2) 0.028(2) 0.0217(19) -0.0002(15) 0.0067(17) 0.0098(18) 
C3 0.030(2) 0.027(2) 0.028(2) 0.0033(16) 0.0032(18) -0.0014(18) 
C4 0.037(2) 0.039(2) 0.0170(19) -0.0012(16) 0.0012(17) -0.0103(19) 
C5 0.037(2) 0.040(2) 0.024(2) -0.0128(17) 0.0089(18) -0.004(2) 
C6 0.038(2) 0.027(2) 0.023(2) 0.0009(17) 0.0059(19) 0.0065(19) 
C7 0.034(2) 0.029(2) 0.0198(19) 0.0013(15) 0.0069(17) 0.0011(17) 
C8 0.027(2) 0.032(2) 0.0216(19) 0.0003(15) 0.0007(17) -0.0023(17) 
C9 0.027(2) 0.032(2) 0.0185(18) 0.0020(15) 0.0038(17) 0.0024(17) 
C10 0.033(2) 0.037(2) 0.0193(19) -0.0021(16) 0.0053(18) 0.0063(18) 
C11 0.029(2) 0.034(2) 0.0169(19) 0.0022(15) 0.0018(17) 0.0022(17) 
C12 0.025(2) 0.032(2) 0.024(2) 0.0031(16) 0.0080(17) 0.0035(17) 
C13 0.051(3) 0.058(3) 0.031(2) 0.0092(19) 0.001(2) 0.018(2) 
C14 0.053(3) 0.039(2) 0.030(2) -0.0020(17) 0.013(2) -0.004(2) 
C15 0.044(2) 0.037(2) 0.036(2) -0.0113(18) 0.004(2) -0.007(2) 
C16 0.047(3) 0.042(2) 0.053(3) 0.012(2) -0.006(2) 0.004(2) 
C17 0.028(2) 0.048(2) 0.020(2) 0.0017(17) 0.0028(18) 0.0032(19) 
C18 0.029(2) 0.062(3) 0.028(2) -0.0016(19) 0.002(2) 0.005(2) 
C19 0.030(2) 0.041(2) 0.026(2) 0.0005(17) 0.0042(19) 0.0034(19) 
C20 0.034(2) 0.058(3) 0.041(3) 0.000(2) -0.009(2) 0.003(2) 
N1 0.048(2) 0.055(2) 0.035(2) -0.0226(17) 0.0215(18) -0.0272(19) 
N2 0.0218(16) 0.0344(17) 0.0181(15) -0.0048(13) 0.0022(13) 0.0006(14) 
O1 0.0444(18) 0.0562(17) 0.0270(15) -0.0125(13) 0.0035(13) -0.0125(15) 
O2 0.0396(16) 0.0462(16) 0.0259(14) -0.0067(12) 0.0129(13) 0.0081(13) 
C21 0.034(2) 0.036(2) 0.0224(19) 0.0008(16) 0.0023(17) -0.0004(18) 
C22 0.039(2) 0.032(2) 0.0183(18) 0.0011(16) -0.0016(17) -0.0027(18) 
C23 0.042(2) 0.031(2) 0.023(2) 0.0047(16) 0.0035(19) 0.0042(18) 
C24 0.037(2) 0.029(2) 0.030(2) 0.0020(16) 0.0020(19) 0.0003(18) 
C25 0.024(2) 0.033(2) 0.020(2) 0.0102(15) -0.0020(16) -0.0044(17) 
C26 0.026(2) 0.028(2) 0.0123(17) -0.0025(15) 0.0025(16) 0.0043(17) 
C27 0.019(2) 0.031(2) 0.0138(17) -0.0034(15) -0.0001(15) -0.0027(16) 
C28 0.0194(19) 0.032(2) 0.0174(18) 0.0006(15) -0.0020(16) 0.0018(17) 
C29 0.027(2) 0.032(2) 0.0146(18) -0.0012(15) 0.0004(16) 0.0003(17) 
C30 0.024(2) 0.039(2) 0.0174(18) 0.0029(16) 0.0017(16) -0.0050(18) 
C31 0.022(2) 0.040(2) 0.0151(18) 0.0017(16) 0.0009(16) -0.0001(18) 
C32 0.028(2) 0.031(2) 0.0167(18) 0.0025(15) 0.0000(17) 0.0079(17) 
C33 0.043(3) 0.060(3) 0.034(2) 0.005(2) -0.008(2) -0.013(2) 
C34 0.057(3) 0.033(2) 0.037(2) 0.0002(18) -0.003(2) -0.003(2) 
C35 0.047(3) 0.055(3) 0.032(2) 0.003(2) 0.014(2) 0.014(2) 
C36 0.060(3) 0.048(3) 0.026(2) -0.0023(18) 0.002(2) 0.000(2) 
C37 0.025(2) 0.032(2) 0.0236(19) 0.0027(17) 0.0026(17) -0.0018(18) 
C38 0.038(2) 0.039(2) 0.030(2) 0.0031(18) 0.0016(19) -0.003(2) 
C39 0.024(2) 0.056(3) 0.022(2) 0.0077(17) 0.0018(18) 0.001(2) 
C40 0.032(3) 0.107(4) 0.048(3) 0.016(3) 0.001(2) 0.017(3) 
N3 0.0187(16) 0.0357(18) 0.0271(17) 0.0110(14) -0.0028(14) 0.0027(14) 
N4 0.0331(18) 0.0358(18) 0.0217(16) 0.0078(14) 0.0033(14) -0.0025(15) 
O3 0.0212(14) 0.0436(16) 0.0274(14) 0.0069(11) -0.0040(12) -0.0019(12) 
O4 0.0602(19) 0.0538(17) 0.0302(15) 0.0126(13) 0.0180(15) -0.0154(15) 
 
_geom_special_details 
; 
 All esds (except the esd in the dihedral angle between two l.s. planes) 
 are estimated using the full covariance matrix.  The cell esds are taken 
 into account individually in the estimation of esds in distances, angles 
 and torsion angles; correlations between esds in cell parameters are only 
 used when they are defined by crystal symmetry.  An approximate (isotropic) 
 treatment of cell esds is used for estimating esds involving l.s. planes. 
; 
 
loop_ 
 _geom_bond_atom_site_label_1 
 _geom_bond_atom_site_label_2 
 _geom_bond_distance 
 _geom_bond_site_symmetry_2 
 _geom_bond_publ_flag 
C1 C5 1.517(5) . ? 
C1 C2 1.530(4) . ? 
C1 H1A 0.9900 . ? 
C1 H1B 0.9900 . ? 
C2 N2 1.493(4) . ? 
C2 C14 1.527(5) . ? 
C2 C13 1.536(5) . ? 
C3 N2 1.491(4) . ? 
C3 C16 1.524(5) . ? 
C3 C15 1.530(5) . ? 
C3 C4 1.536(5) . ? 
C4 C5 1.514(5) . ? 
C4 H4A 0.9900 . ? 
C4 H4B 0.9900 . ? 
C5 N1 1.455(4) . ? 
C5 H5A 1.0000 . ? 
C6 O1 1.213(4) . ? 
C6 N1 1.348(5) . ? 
C6 C7 1.503(5) . ? 
C7 C12 1.380(5) . ? 
C7 C8 1.400(5) . ? 
C8 C9 1.394(4) . ? 
C8 H8A 0.9500 . ? 
C9 C10 1.387(5) . ? 
C9 C17 1.452(5) . ? 
C10 C11 1.398(5) . ? 
C10 H10A 0.9500 . ? 
C11 C12 1.393(4) . ? 
C11 C19 1.444(5) . ? 
C12 H12A 0.9500 . ? 
C13 H13A 0.9800 . ? 
C13 H13B 0.9800 . ? 
C13 H13C 0.9800 . ? 
C14 H14A 0.9800 . ? 
C14 H14B 0.9800 . ? 
C14 H14C 0.9800 . ? 
C15 H15A 0.9800 . ? 
C15 H15B 0.9800 . ? 
C15 H15C 0.9800 . ? 
C16 H16A 0.9800 . ? 
C16 H16B 0.9800 . ? 
C16 H16C 0.9800 . ? 
C17 C18 1.161(5) . ? 
C18 H18 0.9500 . ? 
C19 C20 1.174(5) . ? 
C20 H20 0.9500 . ? 
N1 H1 0.79(4) . ? 
N2 O2 1.284(3) . ? 
C21 C25 1.503(5) . ? 
C21 C22 1.540(5) . ? 
C21 H21A 0.9900 . ? 
C21 H21B 0.9900 . ? 
C22 N4 1.507(4) . ? 
C22 C34 1.526(5) . ? 
C22 C33 1.533(5) . ? 
C23 N4 1.494(4) . ? 
C23 C24 1.524(5) . ? 
C23 C36 1.525(5) . ? 
C23 C35 1.532(5) . ? 
C24 C25 1.520(4) . ? 
C24 H24A 0.9900 . ? 
C24 H24B 0.9900 . ? 
C25 N3 1.463(4) . ? 
C25 H25A 1.0000 . ? 
C26 O3 1.230(4) . ? 
C26 N3 1.341(4) . ? 
C26 C27 1.507(5) . ? 
C27 C28 1.386(4) . ? 
C27 C32 1.387(4) . ? 
C28 C29 1.398(5) . ? 
C28 H28A 0.9500 . ? 
C29 C30 1.398(5) . ? 
C29 C37 1.432(5) . ? 
C30 C31 1.385(5) . ? 
C30 H30A 0.9500 . ? 
C31 C32 1.413(5) . ? 
C31 C39 1.440(5) . ? 
C32 H32A 0.9500 . ? 
C33 H33A 0.9800 . ? 
C33 H33B 0.9800 . ? 
C33 H33C 0.9800 . ? 
C34 H34A 0.9800 . ? 
C34 H34B 0.9800 . ? 
C34 H34C 0.9800 . ? 
C35 H35A 0.9800 . ? 
C35 H35B 0.9800 . ? 
C35 H35C 0.9800 . ? 
C36 H36A 0.9800 . ? 
C36 H36B 0.9800 . ? 
C36 H36C 0.9800 . ? 
C37 C38 1.181(5) . ? 
C38 H38 0.9500 . ? 
C39 C40 1.171(5) . ? 
C40 H40 0.9500 . ? 
N3 H3 0.88(3) . ? 
N4 O4 1.292(3) . ? 
 
loop_ 
 _geom_angle_atom_site_label_1 
 _geom_angle_atom_site_label_2 
 _geom_angle_atom_site_label_3 
 _geom_angle 
 _geom_angle_site_symmetry_1 
 _geom_angle_site_symmetry_3 
 _geom_angle_publ_flag 
C5 C1 C2 114.3(3) . . ? 
C5 C1 H1A 108.7 . . ? 
C2 C1 H1A 108.7 . . ? 
C5 C1 H1B 108.7 . . ? 
C2 C1 H1B 108.7 . . ? 
H1A C1 H1B 107.6 . . ? 
N2 C2 C14 107.6(3) . . ? 
N2 C2 C1 109.3(3) . . ? 
C14 C2 C1 109.9(3) . . ? 
N2 C2 C13 108.8(3) . . ? 
C14 C2 C13 109.1(3) . . ? 
C1 C2 C13 112.1(3) . . ? 
N2 C3 C16 107.8(3) . . ? 
N2 C3 C15 109.7(3) . . ? 
C16 C3 C15 109.4(3) . . ? 
N2 C3 C4 109.2(3) . . ? 
C16 C3 C4 109.1(3) . . ? 
C15 C3 C4 111.6(3) . . ? 
C5 C4 C3 113.5(3) . . ? 
C5 C4 H4A 108.9 . . ? 
C3 C4 H4A 108.9 . . ? 
C5 C4 H4B 108.9 . . ? 
C3 C4 H4B 108.9 . . ? 
H4A C4 H4B 107.7 . . ? 
N1 C5 C4 109.6(3) . . ? 
N1 C5 C1 110.0(3) . . ? 
C4 C5 C1 108.2(3) . . ? 
N1 C5 H5A 109.6 . . ? 
C4 C5 H5A 109.6 . . ? 
C1 C5 H5A 109.6 . . ? 
O1 C6 N1 122.7(3) . . ? 
O1 C6 C7 121.7(3) . . ? 
N1 C6 C7 115.5(3) . . ? 
C12 C7 C8 118.9(3) . . ? 
C12 C7 C6 124.0(3) . . ? 
C8 C7 C6 117.0(3) . . ? 
C9 C8 C7 120.4(3) . . ? 
C9 C8 H8A 119.8 . . ? 
C7 C8 H8A 119.8 . . ? 
C10 C9 C8 119.7(3) . . ? 
C10 C9 C17 119.1(3) . . ? 
C8 C9 C17 121.2(3) . . ? 
C9 C10 C11 120.6(3) . . ? 
C9 C10 H10A 119.7 . . ? 
C11 C10 H10A 119.7 . . ? 
C12 C11 C10 118.6(3) . . ? 
C12 C11 C19 121.6(3) . . ? 
C10 C11 C19 119.8(3) . . ? 
C7 C12 C11 121.7(3) . . ? 
C7 C12 H12A 119.1 . . ? 
C11 C12 H12A 119.1 . . ? 
C2 C13 H13A 109.5 . . ? 
C2 C13 H13B 109.5 . . ? 
H13A C13 H13B 109.5 . . ? 
C2 C13 H13C 109.5 . . ? 
H13A C13 H13C 109.5 . . ? 
H13B C13 H13C 109.5 . . ? 
C2 C14 H14A 109.5 . . ? 
C2 C14 H14B 109.5 . . ? 
H14A C14 H14B 109.5 . . ? 
C2 C14 H14C 109.5 . . ? 
H14A C14 H14C 109.5 . . ? 
H14B C14 H14C 109.5 . . ? 
C3 C15 H15A 109.5 . . ? 
C3 C15 H15B 109.5 . . ? 
H15A C15 H15B 109.5 . . ? 
C3 C15 H15C 109.5 . . ? 
H15A C15 H15C 109.5 . . ? 
H15B C15 H15C 109.5 . . ? 
C3 C16 H16A 109.5 . . ? 
C3 C16 H16B 109.5 . . ? 
H16A C16 H16B 109.5 . . ? 
C3 C16 H16C 109.5 . . ? 
H16A C16 H16C 109.5 . . ? 
H16B C16 H16C 109.5 . . ? 
C18 C17 C9 177.1(4) . . ? 
C17 C18 H18 180.0 . . ? 
C20 C19 C11 178.8(4) . . ? 
C19 C20 H20 180.0 . . ? 
C6 N1 C5 123.2(3) . . ? 
C6 N1 H1 116(3) . . ? 
C5 N1 H1 117(3) . . ? 
O2 N2 C3 116.3(3) . . ? 
O2 N2 C2 115.2(3) . . ? 
C3 N2 C2 124.9(3) . . ? 
C25 C21 C22 113.9(3) . . ? 
C25 C21 H21A 108.8 . . ? 
C22 C21 H21A 108.8 . . ? 
C25 C21 H21B 108.8 . . ? 
C22 C21 H21B 108.8 . . ? 
H21A C21 H21B 107.7 . . ? 
N4 C22 C34 107.6(3) . . ? 
N4 C22 C33 108.9(3) . . ? 
C34 C22 C33 109.8(3) . . ? 
N4 C22 C21 109.4(3) . . ? 
C34 C22 C21 109.3(3) . . ? 
C33 C22 C21 111.8(3) . . ? 
N4 C23 C24 109.1(3) . . ? 
N4 C23 C36 107.3(3) . . ? 
C24 C23 C36 109.2(3) . . ? 
N4 C23 C35 109.3(3) . . ? 
C24 C23 C35 111.9(3) . . ? 
C36 C23 C35 110.0(3) . . ? 
C25 C24 C23 114.0(3) . . ? 
C25 C24 H24A 108.8 . . ? 
C23 C24 H24A 108.8 . . ? 
C25 C24 H24B 108.8 . . ? 
C23 C24 H24B 108.8 . . ? 
H24A C24 H24B 107.7 . . ? 
N3 C25 C21 112.6(3) . . ? 
N3 C25 C24 109.4(3) . . ? 
C21 C25 C24 108.6(3) . . ? 
N3 C25 H25A 108.7 . . ? 
C21 C25 H25A 108.7 . . ? 
C24 C25 H25A 108.7 . . ? 
O3 C26 N3 122.3(3) . . ? 
O3 C26 C27 120.0(3) . . ? 
N3 C26 C27 117.6(3) . . ? 
C28 C27 C32 120.1(3) . . ? 
C28 C27 C26 115.9(3) . . ? 
C32 C27 C26 124.0(3) . . ? 
C27 C28 C29 121.4(3) . . ? 
C27 C28 H28A 119.3 . . ? 
C29 C28 H28A 119.3 . . ? 
C30 C29 C28 118.1(3) . . ? 
C30 C29 C37 122.3(3) . . ? 
C28 C29 C37 119.6(3) . . ? 
C31 C30 C29 121.4(3) . . ? 
C31 C30 H30A 119.3 . . ? 
C29 C30 H30A 119.3 . . ? 
C30 C31 C32 119.6(3) . . ? 
C30 C31 C39 120.9(3) . . ? 
C32 C31 C39 119.5(3) . . ? 
C27 C32 C31 119.5(3) . . ? 
C27 C32 H32A 120.3 . . ? 
C31 C32 H32A 120.3 . . ? 
C22 C33 H33A 109.5 . . ? 
C22 C33 H33B 109.5 . . ? 
H33A C33 H33B 109.5 . . ? 
C22 C33 H33C 109.5 . . ? 
H33A C33 H33C 109.5 . . ? 
H33B C33 H33C 109.5 . . ? 
C22 C34 H34A 109.5 . . ? 
C22 C34 H34B 109.5 . . ? 
H34A C34 H34B 109.5 . . ? 
C22 C34 H34C 109.5 . . ? 
H34A C34 H34C 109.5 . . ? 
H34B C34 H34C 109.5 . . ? 
C23 C35 H35A 109.5 . . ? 
C23 C35 H35B 109.5 . . ? 
H35A C35 H35B 109.5 . . ? 
C23 C35 H35C 109.5 . . ? 
H35A C35 H35C 109.5 . . ? 
H35B C35 H35C 109.5 . . ? 
C23 C36 H36A 109.5 . . ? 
C23 C36 H36B 109.5 . . ? 
H36A C36 H36B 109.5 . . ? 
C23 C36 H36C 109.5 . . ? 
H36A C36 H36C 109.5 . . ? 
H36B C36 H36C 109.5 . . ? 
C38 C37 C29 176.4(4) . . ? 
C37 C38 H38 180.0 . . ? 
C40 C39 C31 179.3(4) . . ? 
C39 C40 H40 180.0 . . ? 
C26 N3 C25 122.3(3) . . ? 
C26 N3 H3 124(2) . . ? 
C25 N3 H3 113(2) . . ? 
O4 N4 C23 115.6(3) . . ? 
O4 N4 C22 115.8(3) . . ? 
C23 N4 C22 123.9(3) . . ? 
 
loop_ 
 _geom_torsion_atom_site_label_1 
 _geom_torsion_atom_site_label_2 
 _geom_torsion_atom_site_label_3 
 _geom_torsion_atom_site_label_4 
 _geom_torsion 
 _geom_torsion_site_symmetry_1 
 _geom_torsion_site_symmetry_2 
 _geom_torsion_site_symmetry_3 
 _geom_torsion_site_symmetry_4 
 _geom_torsion_publ_flag 
C5 C1 C2 N2 45.5(4) . . . . ? 
C5 C1 C2 C14 163.3(3) . . . . ? 
C5 C1 C2 C13 -75.1(4) . . . . ? 
N2 C3 C4 C5 -47.1(4) . . . . ? 
C16 C3 C4 C5 -164.7(3) . . . . ? 
C15 C3 C4 C5 74.4(4) . . . . ? 
C3 C4 C5 N1 -179.5(3) . . . . ? 
C3 C4 C5 C1 60.5(4) . . . . ? 
C2 C1 C5 N1 -179.7(3) . . . . ? 
C2 C1 C5 C4 -59.9(4) . . . . ? 
O1 C6 C7 C12 -155.1(4) . . . . ? 
N1 C6 C7 C12 22.1(5) . . . . ? 
O1 C6 C7 C8 22.5(5) . . . . ? 
N1 C6 C7 C8 -160.4(3) . . . . ? 
C12 C7 C8 C9 0.5(5) . . . . ? 
C6 C7 C8 C9 -177.2(3) . . . . ? 
C7 C8 C9 C10 -1.2(5) . . . . ? 
C7 C8 C9 C17 176.9(3) . . . . ? 
C8 C9 C10 C11 2.2(5) . . . . ? 
C17 C9 C10 C11 -175.9(3) . . . . ? 
C9 C10 C11 C12 -2.3(5) . . . . ? 
C9 C10 C11 C19 178.9(3) . . . . ? 
C8 C7 C12 C11 -0.6(5) . . . . ? 
C6 C7 C12 C11 176.8(3) . . . . ? 
C10 C11 C12 C7 1.6(5) . . . . ? 
C19 C11 C12 C7 -179.7(3) . . . . ? 
C10 C9 C17 C18 42(9) . . . . ? 
C8 C9 C17 C18 -136(9) . . . . ? 
C12 C11 C19 C20 -163(21) . . . . ? 
C10 C11 C19 C20 16(21) . . . . ? 
O1 C6 N1 C5 2.0(6) . . . . ? 
C7 C6 N1 C5 -175.1(3) . . . . ? 
C4 C5 N1 C6 97.0(4) . . . . ? 
C1 C5 N1 C6 -144.1(4) . . . . ? 
C16 C3 N2 O2 -48.1(4) . . . . ? 
C15 C3 N2 O2 70.9(4) . . . . ? 
C4 C3 N2 O2 -166.5(3) . . . . ? 
C16 C3 N2 C2 154.4(3) . . . . ? 
C15 C3 N2 C2 -86.6(4) . . . . ? 
C4 C3 N2 C2 36.0(4) . . . . ? 
C14 C2 N2 O2 47.9(4) . . . . ? 
C1 C2 N2 O2 167.1(3) . . . . ? 
C13 C2 N2 O2 -70.2(4) . . . . ? 
C14 C2 N2 C3 -154.5(3) . . . . ? 
C1 C2 N2 C3 -35.2(4) . . . . ? 
C13 C2 N2 C3 87.5(4) . . . . ? 
C25 C21 C22 N4 46.0(4) . . . . ? 
C25 C21 C22 C34 163.6(3) . . . . ? 
C25 C21 C22 C33 -74.7(4) . . . . ? 
N4 C23 C24 C25 -48.0(4) . . . . ? 
C36 C23 C24 C25 -165.0(3) . . . . ? 
C35 C23 C24 C25 73.0(4) . . . . ? 
C22 C21 C25 N3 179.3(3) . . . . ? 
C22 C21 C25 C24 -59.4(4) . . . . ? 
C23 C24 C25 N3 -175.9(3) . . . . ? 
C23 C24 C25 C21 60.8(4) . . . . ? 
O3 C26 C27 C28 -25.8(4) . . . . ? 
N3 C26 C27 C28 150.5(3) . . . . ? 
O3 C26 C27 C32 153.9(3) . . . . ? 
N3 C26 C27 C32 -29.9(5) . . . . ? 
C32 C27 C28 C29 1.5(5) . . . . ? 
C26 C27 C28 C29 -178.8(3) . . . . ? 
C27 C28 C29 C30 -2.6(5) . . . . ? 
C27 C28 C29 C37 178.0(3) . . . . ? 
C28 C29 C30 C31 2.1(5) . . . . ? 
C37 C29 C30 C31 -178.5(3) . . . . ? 
C29 C30 C31 C32 -0.6(5) . . . . ? 
C29 C30 C31 C39 179.6(3) . . . . ? 
C28 C27 C32 C31 0.1(5) . . . . ? 
C26 C27 C32 C31 -179.6(3) . . . . ? 
C30 C31 C32 C27 -0.5(5) . . . . ? 
C39 C31 C32 C27 179.3(3) . . . . ? 
C30 C29 C37 C38 -179(100) . . . . ? 
C28 C29 C37 C38 0(6) . . . . ? 
C30 C31 C39 C40 61(55) . . . . ? 
C32 C31 C39 C40 -119(100) . . . . ? 
O3 C26 N3 C25 7.8(5) . . . . ? 
C27 C26 N3 C25 -168.4(3) . . . . ? 
C21 C25 N3 C26 -117.4(3) . . . . ? 
C24 C25 N3 C26 121.7(3) . . . . ? 
C24 C23 N4 O4 -167.5(3) . . . . ? 
C36 C23 N4 O4 -49.3(4) . . . . ? 
C35 C23 N4 O4 69.9(4) . . . . ? 
C24 C23 N4 C22 37.7(4) . . . . ? 
C36 C23 N4 C22 155.9(3) . . . . ? 
C35 C23 N4 C22 -84.9(4) . . . . ? 
C34 C22 N4 O4 50.0(4) . . . . ? 
C33 C22 N4 O4 -69.0(4) . . . . ? 
C21 C22 N4 O4 168.6(3) . . . . ? 
C34 C22 N4 C23 -155.3(3) . . . . ? 
C33 C22 N4 C23 85.8(4) . . . . ? 
C21 C22 N4 C23 -36.7(4) . . . . ? 
 
loop_ 
 _geom_hbond_atom_site_label_D 
 _geom_hbond_atom_site_label_H 
 _geom_hbond_atom_site_label_A 
 _geom_hbond_distance_DH 
 _geom_hbond_distance_HA 
 _geom_hbond_distance_DA 
 _geom_hbond_angle_DHA 
 _geom_hbond_site_symmetry_A 
N1 H1 O1  0.79(4) 2.30(4) 2.895(4) 133(4) 8_755 
N3 H3 O2  0.88(3) 2.07(3) 2.923(4) 163(3) 2_664 
 
_diffrn_measured_fraction_theta_max    0.996 
_diffrn_reflns_theta_full              25.41 
_diffrn_measured_fraction_theta_full   0.996 
_refine_diff_density_max    0.255 
_refine_diff_density_min   -0.343 
_refine_diff_density_rms    0.067 

#===END
